# Supplementary material for: Early Time-Dependent Dynamic Changes of TBET and GATA3 mRNA Expressions in Patients with Acute Coronary Syndrome
Source: Hindawi journal article supplement (doi:10.1155/2013/139895), 2013-01-01
Supplement: f1 [file 139895.f1.pdf]

**Supplemental** Table 1. Primer and probe sequences for RT-qPCR

| Transcript          | Sequence                                       |
|---------------------|------------------------------------------------|
| <b><i>TBET</i></b>  |                                                |
| Forward primer      | 5'-TGT TGT GGT CCA AGT TTA ATC AG-3'           |
| Reverse primer      | 5'-CCA CAG TAA ATG ACA GGA ATG G-3'            |
| Probe               | 5'-(FAM) ACG GCG GAT GTT C-(MGBNFQ)-3'         |
| <b><i>GATA3</i></b> |                                                |
| Forward primer      | 5'-GCC ACG GTG CAG AGG TA-3'                   |
| Reverse primer      | 5'-GAA GAT GGT GAT GGG ATT TC-3'               |
| Probe               | 5'-(FAM) ACG GGA GCC AGG TGT-(MGBNFQ)-3'       |
| <b><i>GAPDH</i></b> |                                                |
| Forward primer      | 5'-GAA GGT GAA GGT CGG AGT-3'                  |
| Reverse primer      | 5'-GAA GAT GGT GAT GGG ATT TC-3'               |
| Probe               | 5'-(FAM) CAA GCT TCC CGT TCT CAG CC-(TAMRA)-3' |
